# Supplementary material for: Nonafluorobutyl ether enhancing the stability of fluorobenzene-based diluted high-concentration electrolytes in high-voltage lithium metal batteries
Source: Royal Society of Chemistry journal article supplement (doi:10.1039/d4ta01083c), 2024-01-01
Supplement: d4ta01083c1.pdf [file d4ta01083c1.pdf]

## Supporting Information for

# Nonafluorobutyl Ether Enhancing Stability of Fluorobenzene-based Diluted High-Concentration Electrolyte in High-Voltage Lithium Metal Batteries

Xinlan Wang,<sup>ab</sup> Ziqi Zeng,<sup>\*a</sup> Han Zhang,<sup>a</sup> Yixuan Dong,<sup>a</sup> Shijie Cheng<sup>a</sup> and Jia Xie<sup>\*a</sup>

<sup>a</sup> State Key Laboratory of Advanced Electromagnetic Technology, School of Electrical and Electronic Engineering, Huazhong University of Science and Technology, Wuhan 430074, China. E-mail: [ziqizeng@hust.edu.cn](mailto:ziqizeng@hust.edu.cn), [xiejia@hust.edu.cn](mailto:xiejia@hust.edu.cn).

<sup>b</sup> State Key Laboratory of Materials Processing and Die & Mould Technology, School of Materials Science and Engineering, Huazhong University of Science and Technology, Wuhan 430074, China.

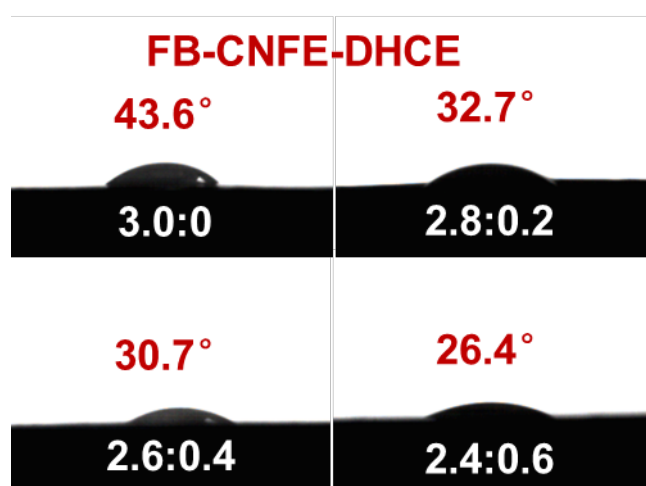

Fig. S1 Wettability tests of separator contact with different electrolytes.

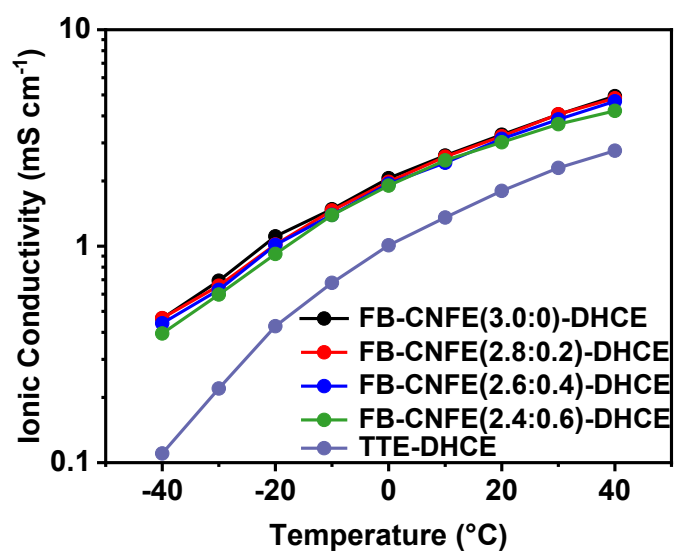

Fig. S2 Ionic conductivity of different electrolytes of -40 to 40 °C.

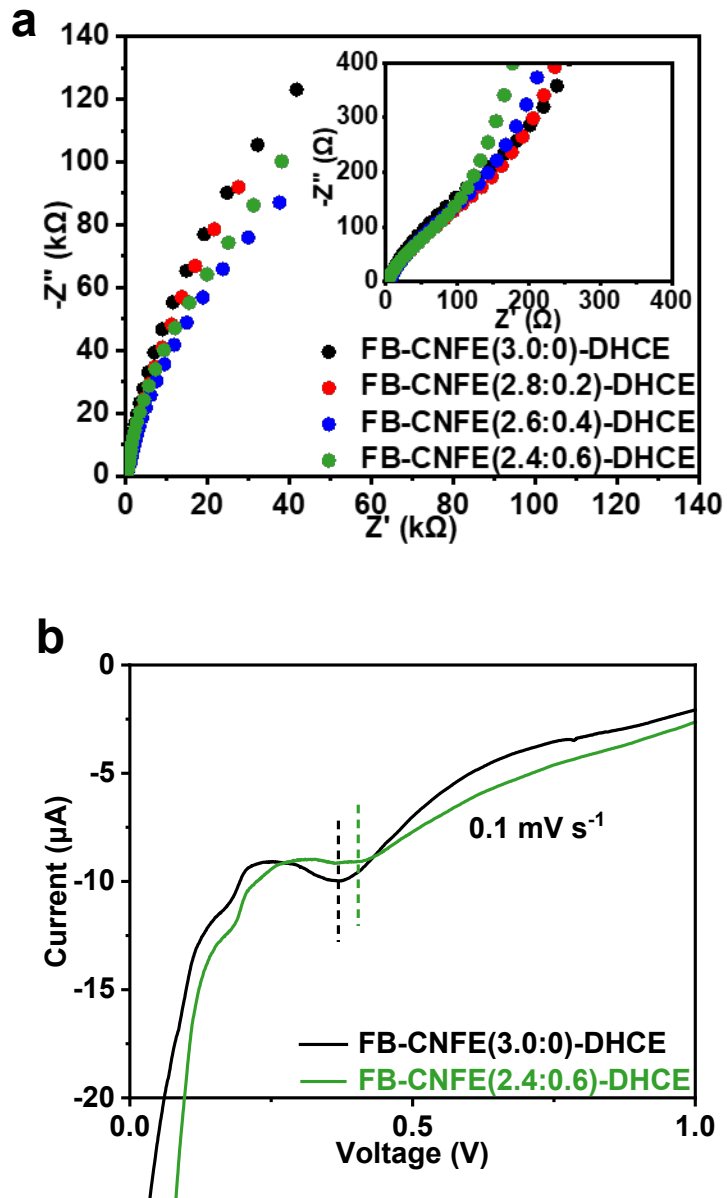

Fig. S3 (a) EIS results before the LSV tests. (b) LSV curves of FB-DHCE and FB-CNFE-DHCE from 1 V to 0 V.

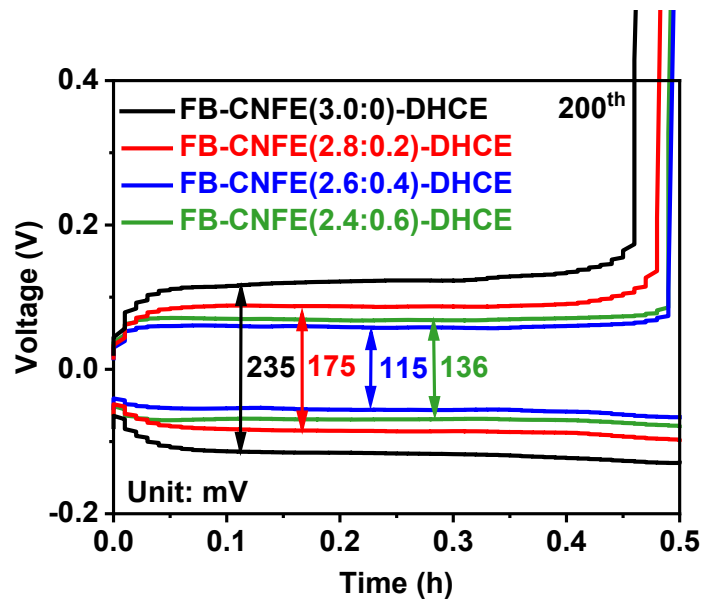

Fig. S4 Discharge-charge curves of the cells at 200<sup>th</sup> cycle in the different electrolytes.

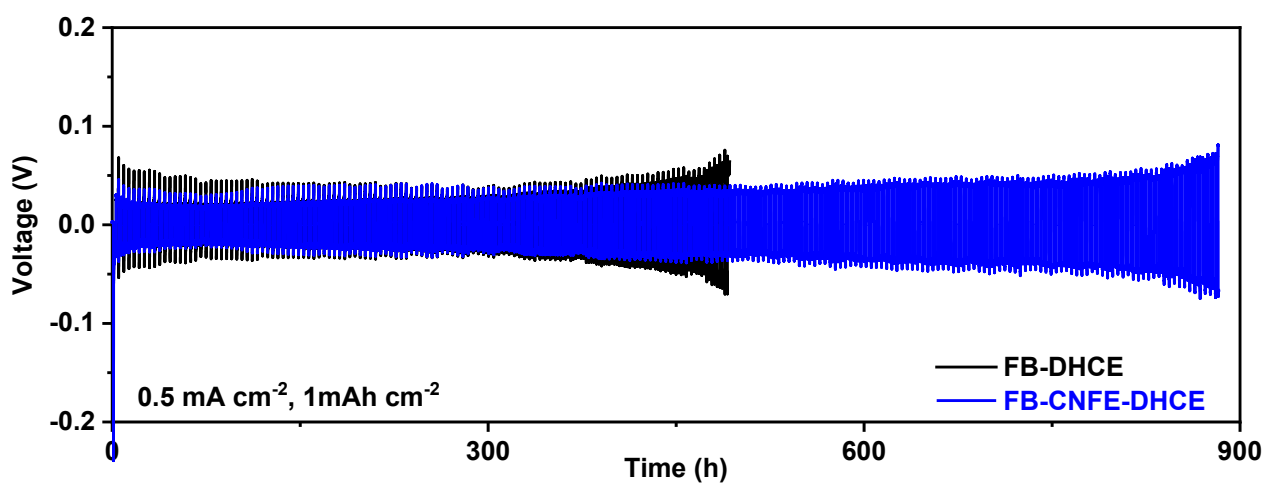

Fig. S5 Cycling performance of Li||Li cells at 0.5 mA cm<sup>-2</sup>.

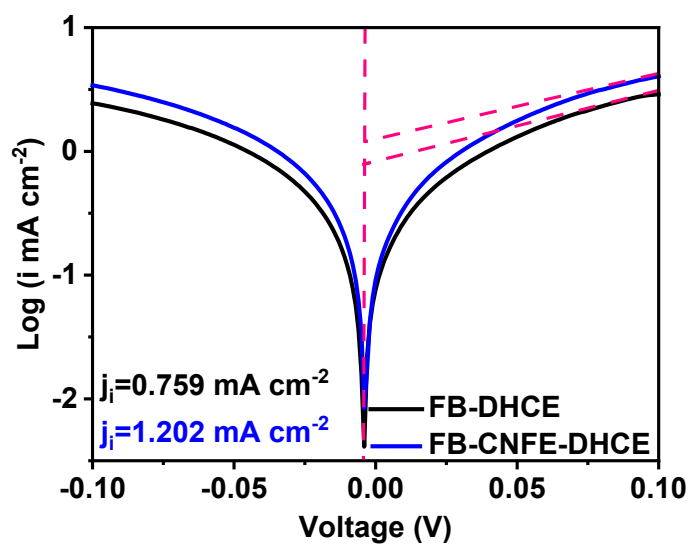

Fig. S6 Tafel plots for Li stripping/plating in the different electrolytes.

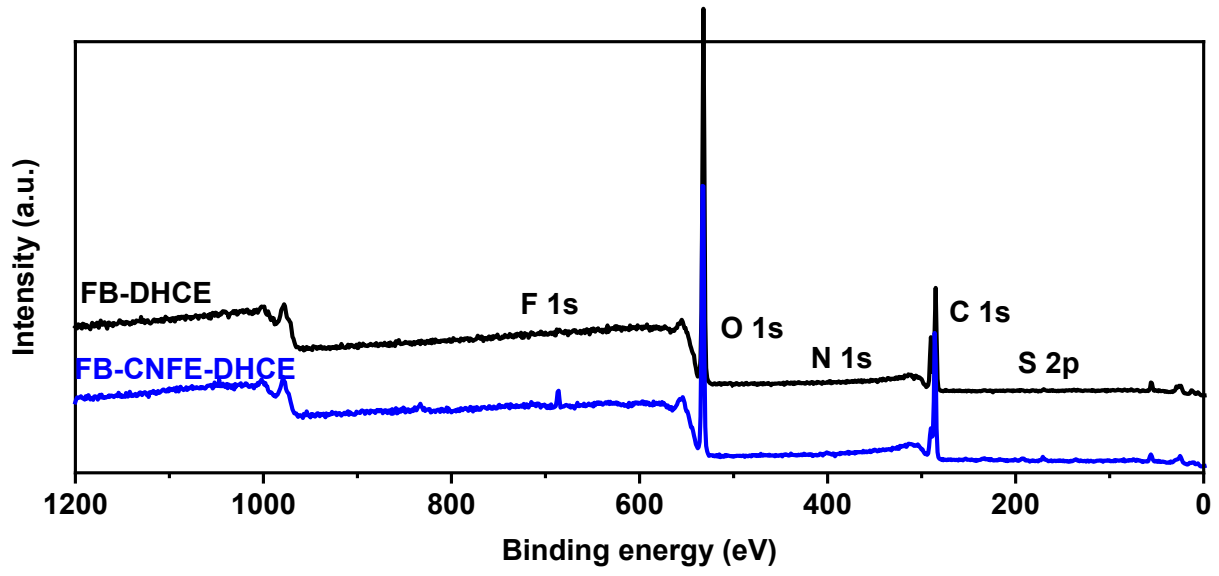

Fig. S7 The full XPS of deposited Li in different electrolytes.

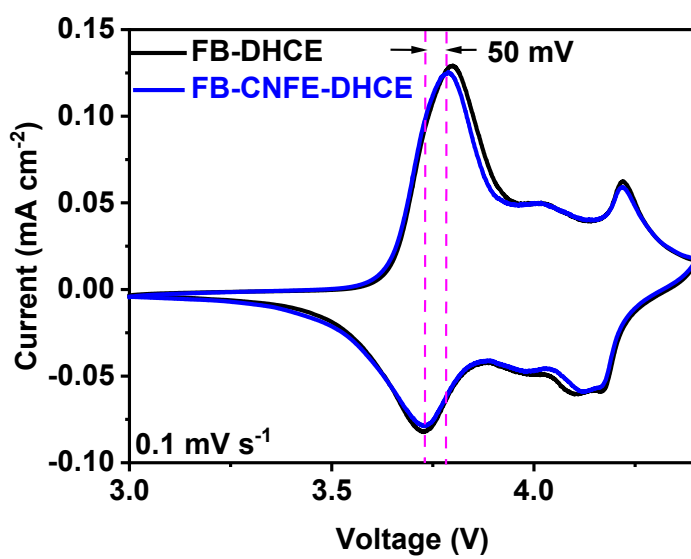

Fig. S8 CV curves of the initial cycles for Li||NCM811 cell under different electrolytes (3 - 4.4 V, 0.1 mV s<sup>-1</sup>).



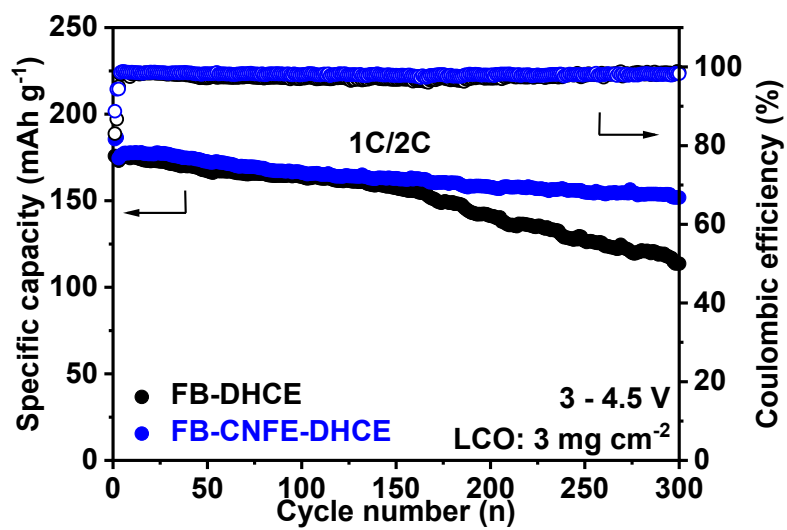

Fig. S9 Cycling performance of Li||LCO cells (LCO loading: 3 mg cm<sup>-2</sup>) with different electrolytes, cycled between 3.0 and 4.5 V at 1 C charge and 2 C discharge.

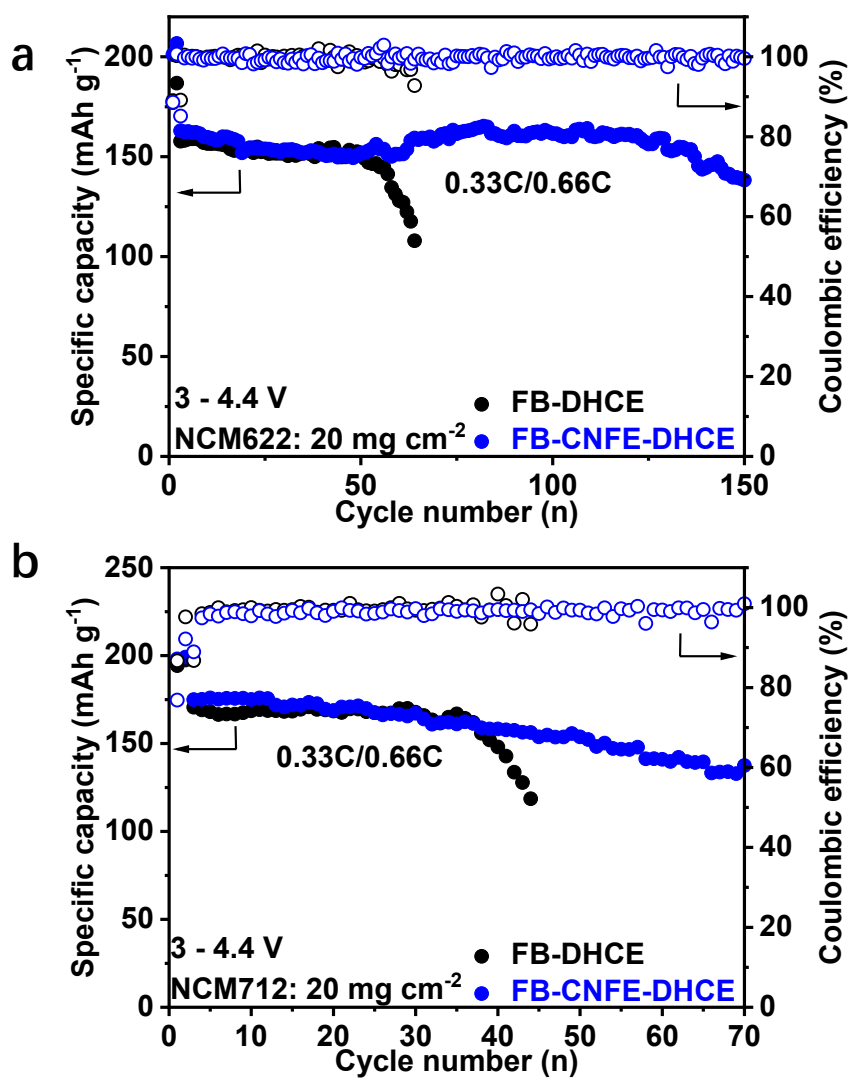

Fig. S10 Cycling performance of (a) Li||NCM622 cells (NCM622 loading:  $20 \text{ mg cm}^{-2}$ ) and (b) Li||NCM712 cells (NCM712 loading:  $20 \text{ mg cm}^{-2}$ ) with different electrolytes, cycled between 3.0 and 4.4 V at 0.33 C charge and 0.66 C discharge.

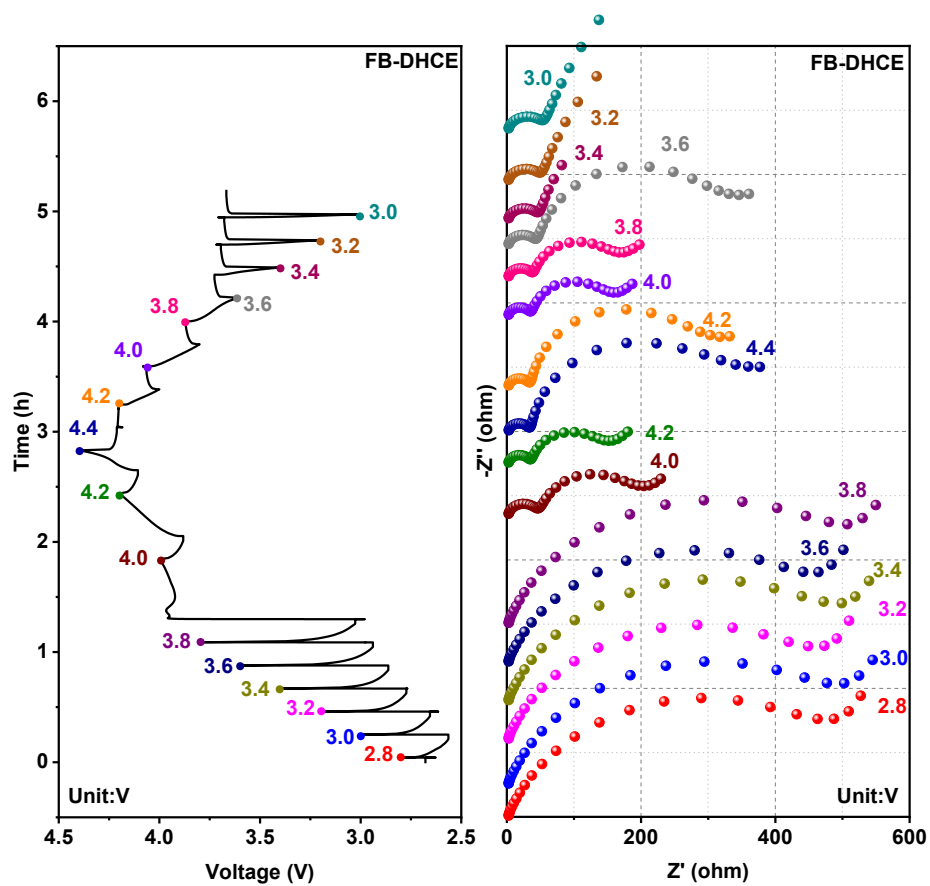

Fig. S11 The in-situ EIS spectra of Li||NCM811 cell in FB-DHCE. The initial cycle charge and discharge profile are plotted at left side of each spectrum.

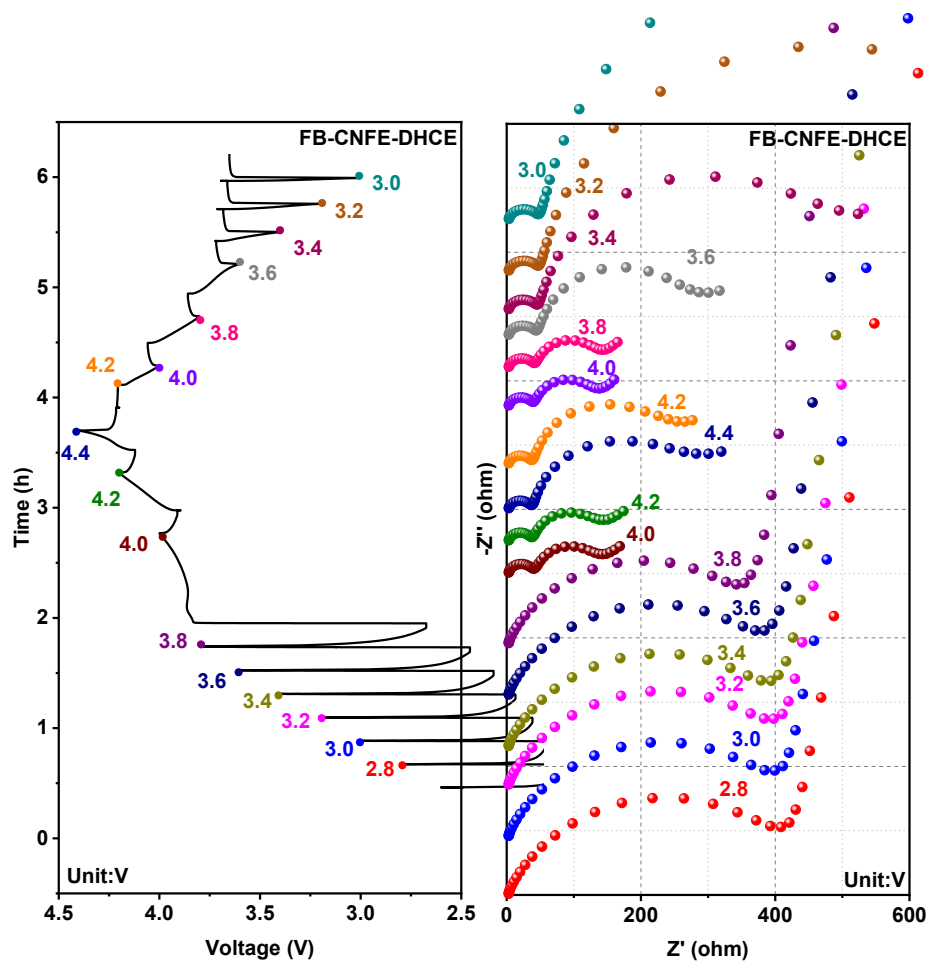

Fig. S12 The in-situ EIS spectra of Li||NCM811 cell in FB-CNFE-DHCE.

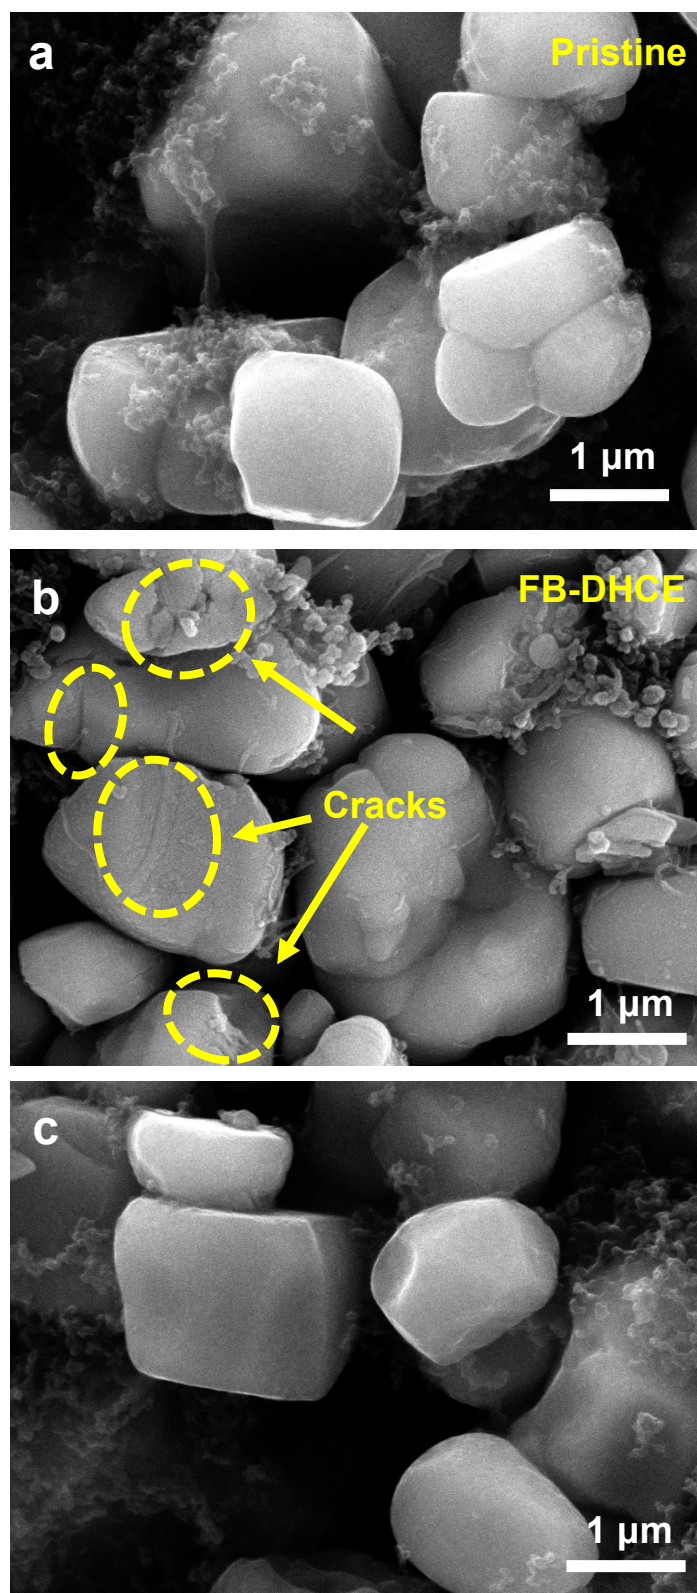

Fig. S13 SEM images of NCM811 (a) uncycled and after cycling at 4.4 V in (b) FB-DHCE and (c) FB-CNFE-DHCE.

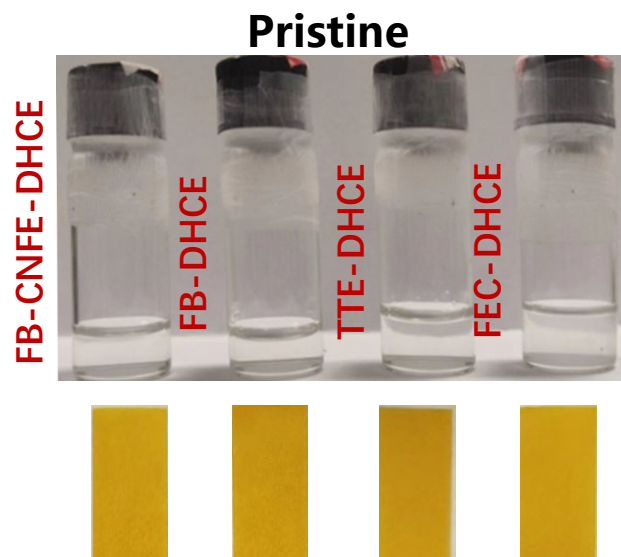

Fig. S14 Photographs and pH results of FB-CNFE-DHCE, FB-DHCE, TTE-DHCE, and FEC-DHCE before storage.

Table S1. Chemical element on Li metal films in different electrolytes.

| Atomic Conc. % | C     | O     | F    | N    | S    |
|----------------|-------|-------|------|------|------|
| FB-DHCE        | 37.35 | 51.48 | 5.08 | 2.67 | 3.42 |
| FB-CNFE-DHCE   | 34.19 | 55.58 | 6.11 | 1.75 | 2.37 |

Table S2. Chemical element on NCM811 films in different electrolytes.

| Atomic Conc. % | C     | O     | F     | N    | S    |
|----------------|-------|-------|-------|------|------|
| FB-DHCE        | 32.63 | 43.03 | 21.37 | 1.11 | 1.87 |
| FB-CNFE-DHCE   | 30.74 | 41.8  | 25.11 | 0.91 | 1.45 |
